# Supplementary material for: Physiological Responses of Chickpea Genotypes to Cold and Heat Stress in Flowering Stage
Source: MDPI journal article supplement (doi:10.3390/agronomy12112755), 2022-11-05
Supplement: s1 [file s1]

**Table S1.** Actual climate conditions in control, cold stress and heat stress chamber under treatment and control conditions. The data represent average values  $\pm$  SD of Temperature (T, °C), relative humidity (RH, %), and light intensity (Light,  $\mu\text{mol m}^{-2} \text{s}^{-1}$ ) at day and night period.

| climate chamber | period          | T (°C)         | RH (%)         | Light ( $\mu\text{mol m}^{-2} \text{s}^{-1}$ ) |
|-----------------|-----------------|----------------|----------------|------------------------------------------------|
| control         | day             | 23.8 $\pm$ 0.5 | 55.5 $\pm$ 1.1 | 331.8 $\pm$ 12.2                               |
|                 | night           | 19.5 $\pm$ 0.2 | 47.8 $\pm$ 0.5 | 0                                              |
| cold stress     | day treatment   | 9.1 $\pm$ 0.7  | 69.1 $\pm$ 2.9 | 308.5 $\pm$ 8.8                                |
|                 | night treatment | 4.9 $\pm$ 0.2  | 73.4 $\pm$ 2.4 | 0                                              |
|                 | day control     | 24.3 $\pm$ 0.7 | 63.6 $\pm$ 0.7 | 315.4 $\pm$ 8.2                                |
|                 | night control   | 20.3 $\pm$ 0.2 | 54.4 $\pm$ 0.5 | 0                                              |
| heat stress     | day treatment   | 36.2 $\pm$ 0.4 | 74.6 $\pm$ 1   | 351.1 $\pm$ 4.6                                |
|                 | night treatment | 31.7 $\pm$ 0.8 | 64.9 $\pm$ 3.3 | 0                                              |
|                 | day control     | 24.6 $\pm$ 1   | 57.5 $\pm$ 1.2 | 347.4 $\pm$ 10.2                               |
|                 | night control   | 19.9 $\pm$ 0.2 | 50 $\pm$ 1.1   | 0                                              |

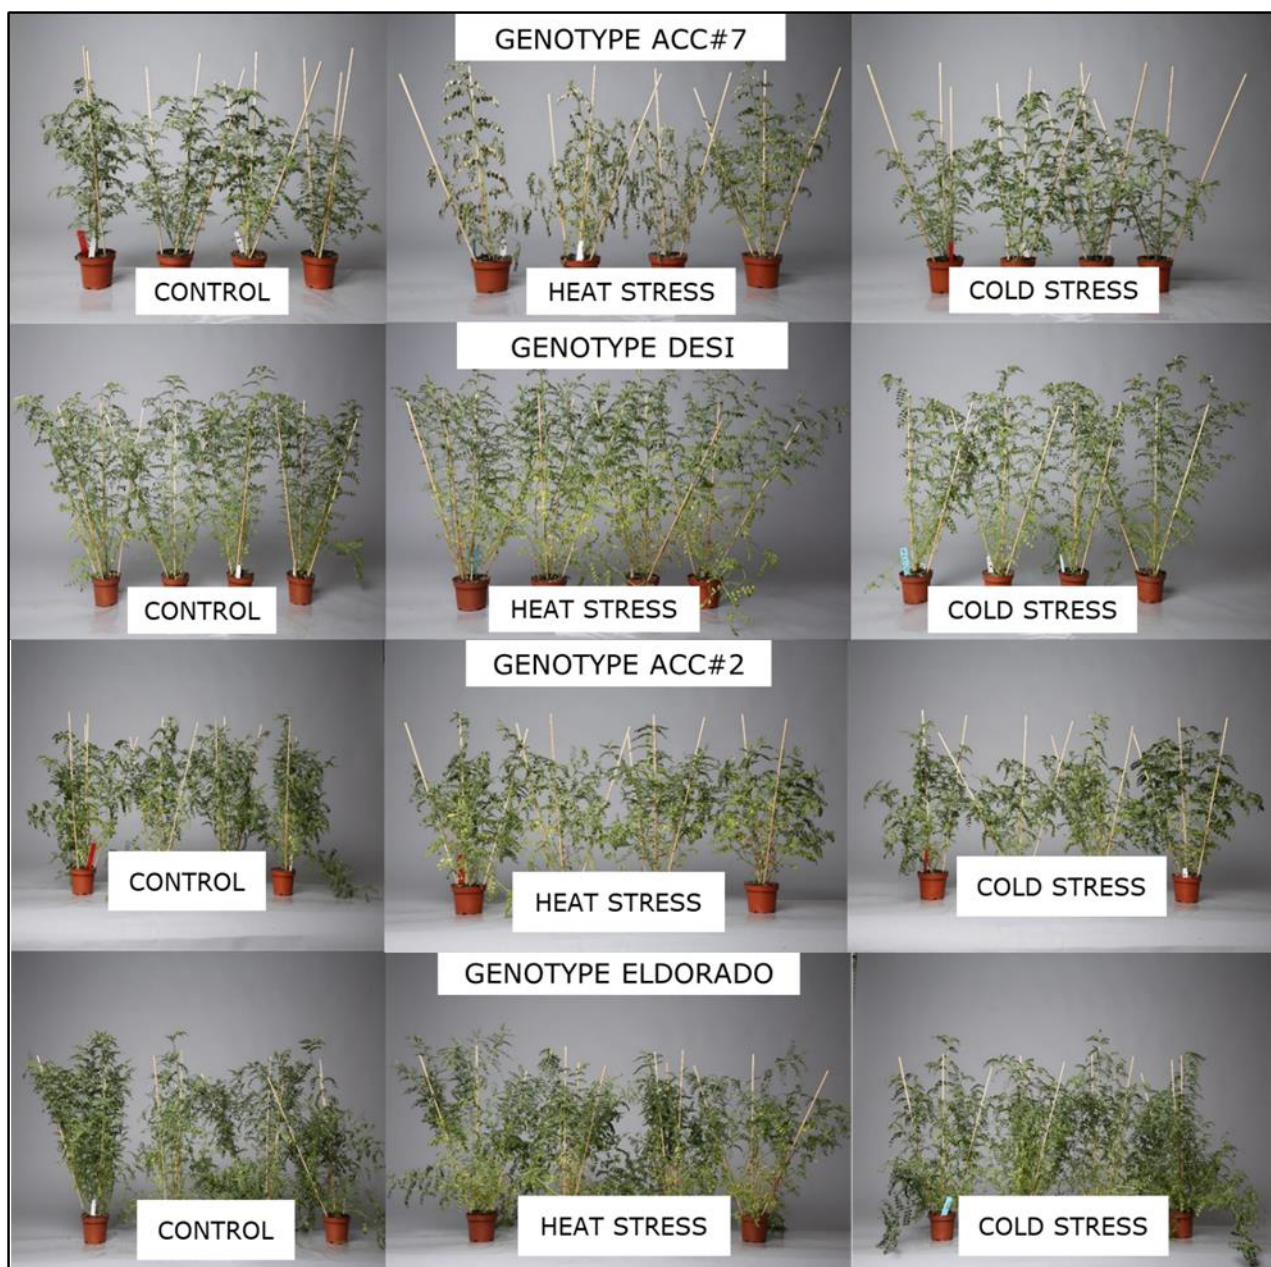

**Figure S1.** Plant morphology of four chickpea genotypes at the treatments for three days: Control (25/20 °C day/night), heat stress (38/33 °C day/night) and cold stress (8/4 °C day/night).
